# Supplementary material for: Iridescent Features Correlating with Periodic Assemblies in Custom-Crystallized Arylate Polyesters
Source: MDPI journal article supplement (doi:10.3390/ijms242115538), 2023-10-24
Supplement: s1 [file s1]

# Supporting Information

## Iridescent Features Correlating with Periodic Assemblies in Custom-Crystallized Arylate Polyesters

Widyantari Rahmayanti, Selvaraj Nagarajan, Ya-Sen Sun \* and Eamor M. Woo \*

Department of Chemical Engineering, National Cheng Kung University, No. 1, University Road,  
Tainan 701-01, Taiwan; widyantari32@gmail.com (W.R.); nagarajan.tech@gmail.com (S.N.)

\* Correspondence: yssun@gs.ncku.edu.tw (Y.-S.S.); emwoo@mail.ncku.edu.tw (E.M.W.);

Tel.: +886-6-275-7575 (ext. 62670) (E.M.W.); Fax: +886-6-234-4496 (E.M.W.)

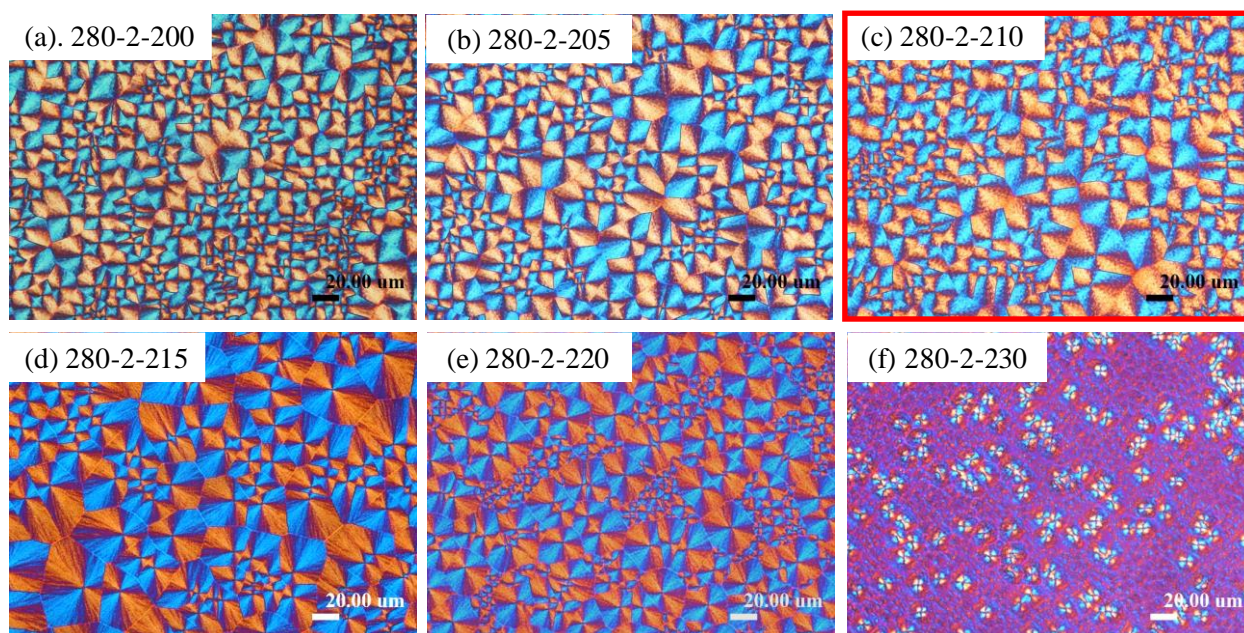

Figure S1. POM images for PET films crystallized at T<sub>c</sub>=200, 205, 210, 215, 220, 230 °C, after being melted for 2 minutes at a same max-melt temperature (T<sub>max</sub>) of 280 °C.
